1 **Within-patient evolution to piperacillin/tazobactam resistance in a clinical isolate of *Escherichia***  
2 ***coli* due to IS26-mediated amplification of *bla*<sub>TEM-1B</sub>.**

3

4 Alasdair T. M. Hubbard<sup>1, \*</sup>, Jenifer Mason<sup>2</sup>, Paul Roberts<sup>2</sup>, Christopher M. Parry<sup>3,4,5,6</sup>, Caroline  
5 Corless<sup>2</sup>, Jon van Aartsen<sup>2</sup>, Alex Howard<sup>2</sup>, Alice J. Fraser<sup>1</sup>, Emily R. Adams<sup>1</sup>, Adam P. Roberts<sup>1</sup> and  
6 Thomas Edwards<sup>1, \*</sup>

7

8 <sup>1</sup>Department of Tropical Disease Biology, Liverpool School of Tropical Medicine, Pembroke Place,  
9 Liverpool, L3 5QA

10 <sup>2</sup>The Royal Liverpool University Hospital, Prescot Street, Liverpool, L7 8XP

11 <sup>3</sup>Alder Hey Children's NHS Foundation Trust, Eaton Road, Liverpool, L12 2AP

12 <sup>4</sup>Department of Clinical Infection, Microbiology and Immunology, University of Liverpool, L69 7BE

13 <sup>5</sup>Clinical Sciences, Liverpool School of Tropical Medicine, Pembroke Place, Liverpool, L3 5QA

14 <sup>6</sup>School of Tropical Medicine and Global Health, University of Nagasaki, Japan

15

16 \* Corresponding authors:

17 Dr. Alasdair Hubbard; email: [alasdair.hubbard@lstmed.ac.uk](mailto:alasdair.hubbard@lstmed.ac.uk), telephone: 0151 705 3163

18 Dr. Thomas Edwards; email: [thomas.edwards@lstmed.ac.uk](mailto:thomas.edwards@lstmed.ac.uk), telephone: 0151 705 3308

19

20

21

22

23 **Abstract**

24 A novel phenotype of *Escherichia coli* and *Klebsiella pneumoniae* resistant to piperacillin/tazobactam  
25 (TZP), but susceptible to carbapenems and 3<sup>rd</sup> generation cephalosporins has recently emerged. The  
26 resistance mechanism of this phenotype has been identified as hyperproduction of the  $\beta$ -lactamase  
27 *bla*<sub>TEM</sub>, however the mechanism of hyperproduction in isolates lacking promoter region mutations is  
28 not well understood. We sought to understand this mechanism by focussing on a pair of isolates  
29 obtained from an individual patient across two infection episodes and displaying within-patient  
30 evolution to TZP resistance. Following confirmation that the two isolates were clonal, we found that  
31 the TZP-resistant isolate hyperproduced a  $\beta$ -lactamase but lacked mutations within  $\beta$ -lactamase  
32 promoter regions. Hybrid assembly of long and short sequencing reads of the two isolates revealed  
33 both harboured a novel IS26-flanked composite transposon containing several antibiotic resistance  
34 genes, including *bla*<sub>TEM-1B</sub>, which was designated Tn6762. These resistance genes are also found to be  
35 present on a translocatable unit which had excised from Tn6762 in the TZP-resistant isolate. By  
36 replicating the evolutionary event leading to TZP resistance we were able to observe excision of the  
37 translocatable unit from Tn6762 following exposure to TZP and capture the TU in a plasmid  
38 containing a copy of IS26. Subsequent amplification of the TU, and by extension *bla*<sub>TEM-1B</sub>, leads to  $\beta$ -  
39 lactamase hyperproduction and TZP resistance. Despite a significant increase in gene copy number  
40 (P value = <0.0001), we found that the TZP-resistant isolate was as fit as the susceptible ancestor.  
41 This mechanism of gene amplification, and the subsequent hyperproduction, of *bla*<sub>TEM-1B</sub> is an  
42 important consideration when using genomic data to predict resistance/susceptibility to TZP.

43

44

45

46

47

## 48 Introduction

49  $\beta$ -lactam/ $\beta$ -lactamase inhibitor combinations were developed to overcome the activity of class A  
50 (e.g. TEM-1) and class C  $\beta$ -lactamases (BLs) (e.g. AmpC) [1, 2], which inactivate  $\beta$ -lactam antibiotics  
51 by hydrolysing the  $\beta$ -lactam ring. New  $\beta$ -lactamase inhibitors, particularly metallo- $\beta$ -lactamase  
52 inhibitors, are still urgently required and their discovery and development is the topic of intense  
53 investigation [3].  $\beta$ -lactam/ $\beta$ -lactamase inhibitor combinations currently in clinical use include  
54 amoxicillin/clavulanic acid, ampicillin/sulbactam and piperacillin/tazobactam (TZP), with  
55 ceftolazone/tazobactam and ceftazidime/avibactam recently introduced into clinical use. TZP has  
56 broad spectrum antibacterial activity and is routinely used for intra-abdominal infections and febrile  
57 neutropenia [4, 5]. TZP usage has increased year on year in the UK, from just under 2.1% of all  
58 antibiotics prescribed in 2008-2009 to 3.6% in 2012-2013 [6]. During the 2-year period between April  
59 2012 and March 2014 10.2% of bacteraemia causing *Escherichia coli* isolates in England tested for  
60 TZP susceptibility were resistant [7]. Resistance to TZP has been previously linked to AmpC  
61 hyperproduction, and the co-production of multiple  $\beta$ -lactamases, which also confer resistance to 3<sup>rd</sup>  
62 generation cephalosporins [8]. Additionally, tazobactam is a poor inhibitor of metallo- $\beta$ -lactamase  
63 enzymes, which cause resistance to TZP, alongside 3<sup>rd</sup> generation cephalosporins and carbapenems  
64 [9-11].

65 A novel phenotype in *Klebsiella pneumoniae* and *E. coli* clinical isolates has emerged which has been  
66 classified as TZP-non-susceptible but susceptible to 3<sup>rd</sup> generation cephalosporins and carbapenems  
67 [12-14], indicating a different resistance mechanism. While still relatively rare, one study in the  
68 United States found that the frequency of this phenotype was between 1.9% and 5.6% of *E. coli* and  
69 *K. pneumoniae* isolated from the bloodstream between 2011 and 2015, and specifically 4.1% of all *E.*  
70 *coli* over the study period [14]. The same study reported risk factors associated with the TZP-non-  
71 susceptible but 3<sup>rd</sup> generation cephalosporin and carbapenem susceptible phenotype, including  
72 exposure to  $\beta$ -lactam/ $\beta$ -lactamase inhibitors and cephalosporins within the previous 30 days [14].  
73 Resistance to TZP, but 3<sup>rd</sup> generation cephalosporin and carbapenem susceptible, has been linked to

74 hyperproduction of the  $\beta$ -lactamase *bla*<sub>TEM</sub>, which can hydrolyse piperacillin but not 3<sup>rd</sup> generation  
75 cephalosporins. Hyperproduction is hypothesised to overcome the inhibitory activity of tazobactam,  
76 allowing the hydrolysis of piperacillin [15]. Mechanisms leading to hyperproduction include  
77 mutations in the promoter region of *bla*<sub>TEM</sub>, changing it from a weak promoter (*P3*) to a stronger  
78 promoter (*P4* or *P5*) [16] or a single point mutation further upstream resulting in the overlapping,  
79 stronger promoter *Pa/Pb* superseding the weaker *P3* promoter [17], and increased production of  
80 *bla*<sub>TEM</sub>. Another such mechanism proposed to cause TZP-resistance but 3<sup>rd</sup> generation cephalosporin  
81 and carbapenem susceptibility is increase in copy number of *bla*<sub>TEM</sub> present in the chromosome [15,  
82 18]. Gene amplification has been linked to the cause of temporary antibiotic resistance seen in a  
83 sub-population of bacteria and is known as heteroresistance. Heteroresistance is often lost after  
84 multiple generations in the absence of antibiotic selective pressure, due to the fitness cost imposed  
85 by the production of extra proteins as a result of amplification [19, 20]. While the mechanism of  
86 amplification of the *bla*<sub>TEM</sub> is not well known, recent studies have found that the amplified *bla*<sub>TEM</sub> has  
87 been co-located on a segment of DNA containing other antibiotic resistance genes, such as *aadA* and  
88 *sulI*, termed a genomic resistance module [15]. Amplification of *bla*<sub>TEM</sub> leading to TZP resistance via  
89  $\beta$ -lactamase hyperproduction has also been suggested to be mediated by the presence of the  
90 insertion sequence, IS26 [18]. IS26 is often linked with the movement of antibiotic resistance genes;  
91 for example a translocatable unit (TU) containing IS26 has been shown to be able to excise from the  
92 transposon Tn4352B, which itself was located on a plasmid, between two IS26, leaving one in the  
93 plasmid [21, 22]. Following excision, the single IS26 and antibiotic resistance gene(s) found between  
94 the two insertion sequences forms a circular TU, which then can insert into a plasmid via a  
95 conservative Tnp26-dependent but RecA-independent mechanism, Tnp26 replicative transposition  
96 or RecA-dependent homologous recombination, preferentially adjacent to another IS26 insertion  
97 sequence [21-23].

98 Here, using a clonal pair of *E. coli* isolated from a single patient from two separate infection episodes  
99 which displayed within-patient evolution to TZP resistance, we sought to determine the mechanism

100 of gene amplification resulting in hyperproduction of *bla*<sub>TEM-1B</sub>. We found that a TU was excised from  
101 a novel composite transposon flanked by IS26 present in the chromosome, leading to gene  
102 amplification which did not carry any fitness cost. We were also able to replicate the evolutionary  
103 event leading to the excision in the TZP-susceptible isolate and captured the excised TU in a plasmid  
104 containing a copy of IS26.

105

## 106 **Materials and methods**

### 107 *Bacterial isolates, media and antibiotics*

108 Clinical isolates of *E. coli* isolated from blood cultures between 2010 and 2017 at the Royal Liverpool  
109 University Hospital (Liverpool, UK) which were found to be carbapenem and cephalosporin  
110 susceptible but TZP resistant using the disc diffusion method of antimicrobial susceptibility testing  
111 (AST) were initially identified from isolate records. Isolate records were then searched for a  
112 corresponding carbapenem, cephalosporin and TZP susceptible isolate, isolated in the same or a  
113 previous infection episode from the same patient. Using these criteria, we identified five paired  
114 clinical isolates of *E. coli*. All isolates had been stored at the time of blood culture isolation in glycerol  
115 broth at -80°C.

116 All isolates were grown on LB (Lennox) agar at 37°C for 18 hours followed by growth in LB (Lennox)  
117 broth, (LB, Sigma, UK), iso-sensitest (ISO, Oxoid, UK) or M9 (50% (v/v) M9 minimal salts (2x) (Gibco,  
118 ThermoFisher Scientific, USA), 0.4% D-glucose, 4mM magnesium sulphate (both Sigma, UK) and 0.05  
119 mM calcium chloride (Millipore, USA)) at 37°C for 18 hours at 200 rpm.

120 Piperacillin, tazobactam (both Cayman Chemical, USA), gentamicin (GEN), and amoxicillin  
121 trihydrate:potassium clavulanate (4:1, AMC) were solubilised in molecular grade water (all Sigma,  
122 UK), while chloramphenicol (CHL) and tetracycline (TET) (both Sigma, UK) were solubilised in ethanol  
123 (VWR, USA) and ciprofloxacin (CIP) was solubilised in 0.1N hydrochloric acid solution (both Sigma,  
124 UK). All stock solutions of antibiotics were filter sterilised through a 0.22µm polyethersulfone filter

125 unit (Millipore, USA). In all assays, unless stated, tazobactam was used at a consistent concentration  
126 of 4 µg/ml and the piperacillin concentration was altered.

#### 127 *Restriction Enzyme Digestion*

128 Restriction fragment length polymorphism (RFLP) analysis of 1 µg of 16S rRNA PCR amplicon from  
129 the 10 putative clonal isolates were digested with AlwNI, PpuHI and MslI (all New England Biolabs,  
130 USA) and 1 µg of long fragment genomic DNA extracts of 153964, 152025, 190693 and 169757 were  
131 digested with SpeI and MslI (both New England Biolabs, USA) for 1 hour at 37°C. Both RFLP digest  
132 reactions were incubated for 5 minutes at 80°C and immediately run on a 1% agarose gel. Enzyme  
133 digest of 500 ng of plasmid DNA extracted from 190693 and 169757 was performed with PpuMI and  
134 XhoI (both New England Biolabs, USA) and immediately run on a 1% agarose gel following incubation  
135 for 1 hour at 37°C.

#### 136 *Antimicrobial susceptibility testing*

137 Initial AST for cefpodoxime (CPD), ceftiofex (FOX), TZP, meropenem (MEM), CIP, cefotetan (CTT),  
138 amikacin (AMK), ertapenem (ETP), AMC, chloramphenicol (CHL) and ampicillin (AMP) was performed  
139 in clinic using the disk diffusion method, according to the CLSI guidelines for Antimicrobial  
140 Susceptibility Testing [24].

141 AST for TZP, GEN, CIP, CHL, AMC and TET were performed using the broth microdilution method for  
142 minimum inhibitory concentrations, performed in cation adjusted Mueller Hinton Broth (CA-MHB),  
143 following CLSI Guidelines. Efflux pump inhibition was performed using phenylalanine-arginine β-  
144 naphthylamide (PAβN) as a supplement in CA-MHB at a final concentration of 50µM.

#### 145 *Nitrocefin assay*

146 β-lactam hydrolysis was evaluated using a colorimetric nitrocefin assay. Cell lysates were obtained  
147 from triplicate cultures of 190693 and 169757 in LB, adjusted to an OD<sub>600</sub> of 0.1. Cultures (10ml)  
148 were centrifuged at 14,000 g for 5 minutes, the supernatant discarded, and the pellet resuspended

149 in 5ml phosphate buffered saline (PBS). The cultures were sonicated for three intervals of ten  
150 seconds, on ice, using a Soniprep 150 plus (MSE centrifuges, UK). The lysed cultures were  
151 centrifuged at 14,000 g for 5 minutes, and the supernatant taken as the culture lysate.

152 A total of 90µl of this lysate was then added to 10µl of 0.5mg/ml nitrocefin solution (Sigma, UK) in a  
153 96 well microplate, in triplicate. The absorbance of the plate was read at 450nm every 20 seconds  
154 for 25 minutes, using a SPECTROstar OMEGA spectrophotometer (BMG lab systems).

155 *Whole genome sequencing and bioinformatics*

156 Illumina MiSeq 2 x 250 bp short-read sequencing of long fragment DNA extractions from isolates  
157 190693 and 169757, as well as adapter trimming of the sequencing reads, were provided by  
158 MicrobesNG (MicrobesNG, UK).

159 The same long fragment DNA extracts were processed using the SQK-LSK109 ligation and SQK-  
160 RBK103 barcoding kit and sequenced on an R9.4.1 flow cell with an Oxford Nanopore Technologies  
161 (ONT) MinION. Sequencing reads were basecalled during the sequencing run using MinkNOW, de-  
162 multiplexing and adapter trimming of the basecalled reads were performed using Porechop (v0.2.4)  
163 and finally sequencing reads were filtered for a quality score of 10 via Filtlong (v0.2.0).

164 Both Illumina short-read and MinION long-read sequences were assembled using Unicycler (v0.4.7  
165 [25]), with the quality of the assembly assessed using QUAST (v5.0.2 [26]), annotated using Prokka  
166 (v1.14.0 [27]) and visualised using Bandage (v0.8.1 [28]).

167 Sequence type and serotype of both 190693 and 169757 were determined using Multi-Locus  
168 Sequence Typing (MLST, v2.0.4 [29]) and SerotypeFinder (v2.0.1 [30]), respectively. The relatedness  
169 of the two genomes were compared using MUMmer (v3.23 [31]) and the average nucleotide identity  
170 (ANI) was calculated using OrthoANI (v0.93.1 [32]). Presence of acquired antimicrobial resistance  
171 genes within the two genomes were assessed using ResFinder with minimum threshold of 90% and a  
172 minimum length of 60% (v3.2 [33]) and segments of the two genomes were characterised using

173 SnapGene® software (from GSL Biotech; available at [snapgene.com](http://snapgene.com)). Finally, plasmid replicons were  
174 identified using PlasmidFinder (v2.0.1) [34].

#### 175 *Competent cell preparation*

176 The TZP-susceptible isolate was made competent according to Chung *et al.* [35].

#### 177 *Quantitative PCR*

178 Changes in gene copy number of *bla*<sub>TEM-1B</sub>, *bla*<sub>OXA-1</sub>, *aac(3)-IIa*, *aac(6′)-Ib-cr*, *tet(D)* were calculated via  
179 qPCR, using the  $\Delta\Delta$ CT method for relative quantitation of these genes against the single copy *uidA*  
180 housekeeping gene.

181 Each qPCR reaction contained 6.25µl QuantiTect® SYBR Green PCR buffer (Qiagen, UK), 0.4 µM  
182 forward and reverse primers (Table S1), 1ng of extracted DNA, and molecular grade water to a final  
183 volume of 12.5µl. Reactions were processed using a Rotor-Gene Q (Qiagen, Germany), using the  
184 following protocol; an initial denaturation step of 95°C for 5 minutes, followed by 40 cycles of; DNA  
185 denaturation at 95°C for 10 seconds, primer annealing at 58°C for 30 seconds, and primer extension  
186 at 72°C for 10 seconds with fluorescence monitored in the FAM channel. HRM analysis was carried  
187 out over a temperature range of 75°C to 90°C, increased in 0.1°C increments, in order to confirm  
188 specific amplification. Fluorescence thresholds were set manually for calling Ct values, at 5% of the  
189 difference between baseline and maximum fluorescence.

190 The mean qPCR Ct value for the *uidA* gene from each strain was taken using four replicate qPCR  
191 reactions, and the  $\Delta\Delta$ CT method was utilised to determine fold change using quadruplicate qPCR  
192 reactions for each AMR gene.

#### 193 *In vitro evolution of susceptible isolate*

194 The clinical isolate 190693 (TZP-susceptible isolate) and 190693 transformed with pHSG396:IS26  
195 were subcultured into 10 ml LB and 10 ml LB plus 35 µg/ml chloramphenicol, respectively, and  
196 incubated at 37°C for 18 hours at 200 rpm. Following incubation 10 µl of 190693 was subcultured



197 into 10 ml LB and 10 ml LB plus 8/4 µg/ml TZP and 10 µl of 190693 with pHSG396:IS26 was  
198 subcultured into 10 ml LB plus 35 µg/ml chloramphenicol and 10 ml LB plus 35 µg/ml  
199 chloramphenicol and 8/4 µg/ml TZP and incubated at 37°C for 24 hours at 200 rpm. Genomic DNA  
200 from each of the four cultures were extracted for qPCR following the protocol described above,  
201 however triplicate biological replicates were used instead of quadruplicate qPCR reactions

#### 202 *Translocatable unit capture*

203 The TZP-susceptible isolate 190693 transformed with pHSG396:IS26 was grown in the presence of  
204 TZP and chloramphenicol as previously stated. Following selection, the culture was serially diluted  
205 1/10 in PBS down to 10<sup>-7</sup> dilution and 50 µl of each dilution was plated out on to LB agar  
206 supplemented with 35 µg/ml chloramphenicol and 16/4 µg/ml TZP. Five single colonies were  
207 selected and subcultured into 10 ml LB plus 35 µg/ml chloramphenicol and 16/4 µg/ml TZP for 18  
208 hours at 37°C and 200 rpm and the plasmid extracted following the protocol above. The purified  
209 plasmids were transformed into NEB® 5-alpha competent *E. coli* following the protocol in the  
210 supplementary material and plated out on to LB agar supplemented with 35 µg/ml chloramphenicol  
211 and 16/4 µg/ml TZP and incubated at 37°C for 18 hours. A single colony from each transformation  
212 was subcultured into 10 ml LB supplemented with 35 µg/ml chloramphenicol and 16/4 µg/ml TZP  
213 and incubated at 37°C, 200 rpm for 18 hours and the plasmid extracted following the protocol in the  
214 supplementary material. The initial pHSG396:IS26 plasmid extract and pHSG396:IS26 plasmid  
215 selected in TZP and extracted from NEB® 5-alpha *E. coli* were digested with XhoI (New England  
216 Biolabs, US) and EcoRI for 1 hour at 37°C, followed by a 20 minute incubation at 65°C and run on a  
217 1% agarose gel.

#### 218 *Competitive fitness*

219 The relative fitness of 169757 (TZP-resistant) and 190693 (TZP-susceptible) grown in the presence of  
220 8/4 µg/ml TZP, compared to 190693 and 190693 grown in the absence of TZP, were assessed  
221 comparatively in LB, ISO and M9. Each culture was diluted to an OD<sub>600</sub> of 0.1 in the respective media,

222 then further diluted 1/1000 in the same media and 150 µl of each diluted culture added to a flat  
223 bottom, 96 well microtitre plate in duplicate as well as 150 µl of the media as a negative control. The  
224 96 well plate was incubated at 37°C and the OD<sub>600</sub> of each well was measured with 100 flashes every  
225 10 minutes over 24 hours, with orbital shaking at 200 rpm between readings, using a Clariostar Plus  
226 microplate reader (BMG Labtech, Germany). The relative fitness compared to either 190693 or  
227 190693 grown in the absence of TZP between absorbance values 0.2 and 0.08 and a minimum R  
228 value of 0.9799 was estimated using BAT version 2.1 [36].

### 229 *Statistical analysis*

230 Statistical analysis of comparison for qPCR of the antibiotic resistance genes on the RM of 190693  
231 and 169757 was performed using the 2way ANOVA test. Statistical analysis of comparison for qPCR  
232 of the antibiotic resistance genes on the RM of 190693 grown in the presence or absence of TZP,  
233 with and without pHSG396:IS26 was performed using the Ordinary One-Way ANOVA with  
234 Uncorrected Fisher LSD test. Statistical analysis of relative fitness of 169757 and 190693 grown in  
235 the presence of TZP was performed using Ordinary One-Way ANOVA with Uncorrected Fisher LSD  
236 test. All statistical tests were performed using GraphPad Prism version 8.2.1.

237

## 238 **Results**

### 239 *Identification of clonal isolates*

240 Initially, we identified five isolates in the collection of TZP-resistant, 3<sup>rd</sup> generation cephalosporin  
241 and carbapenem susceptible *E. coli* from blood cultures at the Royal Liverpool University Hospital  
242 which had a corresponding TZP-susceptible isolate from the same or previous infection episode, and  
243 therefore could have evolved to become TZP-resistant within a patient. RFLPs of the 16S rRNA  
244 amplicons from the five pairs of isolates indicated that three pairs of TZP-susceptible/TZP-resistant  
245 clinical isolates had identical digestion patterns (Fig. S1A). Two of these three pairs of isolates had an  
246 identical resistance profile generated during routine disk-based susceptibility testing, aside from TZP

247 (Table S2). RFLPs of genomic DNA identified one pair of isolates with identical banding patterns  
248 indicating clonality; 190693 (TZP-susceptible) and 169757 (TZP-resistant) which were isolated from  
249 different infection episodes from the same patient approximately 3 months apart (Fig. S1B). During  
250 the first infection episode, the TZP-susceptible *E. coli* was isolated and the patient was initially  
251 treated with a five day course of TZP, followed by a seven day course of TZP with teicoplanin and  
252 then a third seven day course of TZP although a second blood culture was found to be negative. A  
253 second infection episode occurred approximately 6-7 weeks after the final course of TZP was  
254 completed, and again the patient was treated initially with TZP until the TZP-resistant *E. coli* was  
255 isolated, when the treatment was changed to meropenem. Putative clonality of these two isolates  
256 was confirmed with whole genome sequencing; both isolates were identified as serotype H30 O86,  
257 sequence type 8 and had an ANI of 100%, with 36 single nucleotide polymorphisms difference  
258 between the two isolates.

#### 259 *Confirmation of TZP susceptibility/resistance and mechanism of resistance*

260 We determined the MIC of the pair of isolates and verified that TZP-susceptible isolate was  
261 susceptible to TZP (2-4/4 µg/ml) and TZP-resistant isolate was resistant to TZP (64/4 µg/ml)  
262 according to EUCAST clinical breakpoints [37] (Table 1). Using the efflux pump inhibitor PAβN as a  
263 supplement in the MIC assay, we were able to rule out overexpression of efflux pumps as a possible  
264 mechanism of resistance as there was less than a 4-fold reduction [15] in MIC of both the TZP-  
265 susceptible (2/4 µg/ml) and TZP-resistant isolates (32/4 µg/ml, Table 1). Whole genome sequencing  
266 revealed no differences in the predicted resistance genes present in the genome between the TZP-  
267 susceptible and TZP-resistant isolate (Table 2) and no mutations in the promoter region of any of the  
268 BLs present within the genome (*bla*<sub>TEM-1B</sub>, *bla*<sub>OXA-1</sub> or *ampC*) of the TZP-resistant isolate. We  
269 confirmed that the TZP-resistant isolate hyperproduced a BL due to the significant increase in  
270 nitrocefin hydrolysis compared to the TZP-sensitive isolate (P value = <0.0001, Fig. 1A).

#### 271 *Hybrid assembly and comparison of the genomes of the TZP-susceptible and TZP-resistant isolates*

272 Using a hybrid assembly of ONT long and Illumina short sequencing reads, we were able to complete  
273 the genome of the TZP-susceptible isolate, which was found to be 5151952 bp in length, with a GC  
274 content of 50.64% and did not contain any plasmids (Fig. S4A). In contrast, we unable to complete  
275 the genome of the TZP-resistant isolate as a 530bp segment remained unresolved, and a complete,  
276 low copy number (2.59x) 106637 bp plasmid containing an IncFII replicon (Fig. S4B) was detected. A  
277 complete, smaller (10899 bp) circular DNA molecule was also found to be present in the TZP-  
278 resistant isolate, at a copy number of 8.51x, however this small circular DNA molecule did not  
279 contain a plasmid replicon (Fig. S4B). The large plasmid did not to contain any predicted  
280 antimicrobial or metal resistance genes, but did contain three bacteriocins, both colicin B and M  
281 (with cognate immunity proteins) and linocin. Comparison of the predicted resistance genes present  
282 on the chromosome of the TZP-susceptible and TZP-resistant isolates highlighted that *bla*<sub>TEM-1B</sub>,  
283 *bla*<sub>OXA-1</sub>, *aac(3)-IIa*, *aac(6')-Ib-cr*, *tet(D)* and *catB3* were missing from the assembled chromosome of  
284 the TZP-resistant isolate (Table 2). Characterisation of the small circular DNA molecule found that it  
285 contained these missing resistance genes, as well as several putative transposable elements  
286 including three copies of IS26 (Table 2), and aligned exactly to the chromosome of the TZP-  
287 susceptible isolate and was no longer present in the chromosome of the TZP-resistant isolate. The  
288 predicted *catB3* resistant gene was truncated to 69.8% length and therefore unlikely to be  
289 functional, which was confirmed as both the TZP-susceptible and TZP-resistant isolates were  
290 sensitive to chloramphenicol according to EUCAST guidelines (Table 1). Further analysis of the TZP-  
291 susceptible genome uncovered that the circular DNA molecule from the TZP-resistant isolate aligned  
292 with 100% identity to a novel integrated composite transposon flanked by two copies of IS26 in the  
293 same orientation, which we subsequently registered as Tn6762 via the transposon registry [38],  
294 however the circular DNA molecule only contained one IS26. The antibiotic resistance gene *bla*<sub>TEM-1B</sub>,  
295 *bla*<sub>OXA-1</sub>, *aac(3)-IIa*, *aac(6')-Ib-cr* and *tet(D)* were identified to be present on Tn6762 (Fig. 2A). This  
296 suggested that a translocatable unit (TU) [21-23], containing one IS26 and the antibiotic resistance  
297 genes, was excised from the chromosomally located Tn6762 while the other IS26 stayed in the

298 chromosome (Fig. 2A). Interestingly, we also found that the tetracycline resistance regulator, *tetR*,  
299 on the TU had been disrupted 52 bp from the end of the *tetR* due to the excision which overlaps the  
300 start of the copy of IS26 remaining in the chromosome. Following excision, a copy of IS26 is present  
301 at the start of the TU which then connects to the end of the TU, containing the disrupted *tetR*,  
302 forming a circular DNA molecule. As the two copies of IS26 are identical and in the same orientation,  
303 and therefore containing the same 52 bp bases missing from *tetR*, *tetR* was reformed when the TU  
304 circularised completing the 657 bp gene.

#### 305 *Confirmation of the presence of Tn6762 and the translocatable unit*

306 Firstly, we confirmed the amplification of the resistance genes found on the TU in the TZP-resistant  
307 isolate and Tn6762 in the chromosome of the TZP-susceptible isolate. Comparing the fold change in  
308 copy number of each resistant gene to the housekeeping gene *uidA*, we found that each resistance  
309 gene on the TU increased in copy number in the TZP-resistant isolate compared to the TZP-  
310 susceptible isolate (Fig. 1B, P value = <0.0001). The increase in copy number of the resistance genes  
311 found on the TU in the TZP-resistant isolate also corresponded to an increase in MIC of all  
312 antimicrobials that the genes confer resistance to (Table 1), further confirming the amplification of  
313 the entire TU. By PCR of the left and right junctions of the chromosomally located Tn6762, with one  
314 primer specific for Tn6762 and one for chromosome either before or after IS26 (Fig. 2B), we were  
315 able to confirm that Tn6762 was present in the chromosome of both the TZP-susceptible isolate and  
316 TZP-resistant isolate by yielding the expected 1640 bp and 2402 bp products, respectively (Fig. S2).  
317 Using primers that would only yield a 1942 bp product if the circular TU was present (Fig. 2C), we  
318 were able to detect the presence of the TU in the TZP-resistant isolate and absence in the TZP-  
319 susceptible isolate (Fig. S2). This suggests that Tn6762 has been excised and existed as a circular TU,  
320 as well as in the chromosome of the TZP-resistant isolate.

#### 321 *Replication of excision of the translocatable unit*

322 Completed assembly of the large plasmid present in the TZP-resistant isolate showed that the  
323 plasmid contained a single copy of IS26. We sought to determine whether the presence of another  
324 mobile IS26 and/or the use of TZP induced the excision of the TU by replicating the evolutionary  
325 event that led to the TZP-sensitive isolate becoming resistant to TZP *in vitro*. We found that there  
326 was a significant increase in copy number of all the resistance genes present on Tn6762, relative to  
327 the housekeeping gene *uidA*, following exposure to 2 x MIC of TZP (8/4 µg/ml) while there was no  
328 evidence of amplification in the same isolate grown in the absence of TZP (P value = 0.0012). There  
329 was also an increase in copy number when the isolate containing the pHSG396:IS26 plasmid was  
330 exposed to TZP but, again, no increase in copy number when TZP was absent (P value = <0.0001),  
331 therefore TZP can either select for the maintenance of the excised TU or induce the excision event,  
332 leading to an increase in copy number of the genes present on Tn6762. In contrast, there was no  
333 significant difference in gene copy number between the TZP-susceptible with and without the  
334 pHSG396:IS26 plasmid grown in the absence of TZP (P value = 0.5064), underlining that the presence  
335 of an extra chromosomal IS26 does not induce excision of the TU from Tn6762.

### 336 *Capture of the translocatable unit*

337 We sought to capture the excised TU, and therefore observe the excision and insertion events, using  
338 a pHSG396 plasmid containing IS26 transformed into the TZP-sensitive isolate in the same  
339 orientation relative to the origin of replication as found on Tn6762 and selected for TZP-resistant  
340 derivatives by growing the isolate in the presence of TZP. We detected the insertion of a >10kb  
341 fragment into the pHSG396:IS26 after TZP selection following digestion with XhoI and EcoRI (Fig.  
342 S3A). Insertion of the TU from the TZP-susceptible chromosome was confirmed through PCR  
343 amplification across the two newly formed junctions on the pHSG396:IS26, with one primer specific  
344 for pHSG396 and one for either *aac(6′)-Ib-cr* (left) or *tet(D)* (right) on the TU for each junction  
345 yielding the expected 1458 bp (left) and 1385 bp (right) products (Fig. 2D), consistent with the  
346 insertion of the TU adjacent to IS26 in the pHSG396 and reforming Tn6762 in pHSG396 (Fig. S3B).

347 *Fitness effect of extensive amplification*

348 Hyperproduction of a protein could result in a fitness cost to the cell due to the increased metabolic  
349 activity. Yet, we found that the amplification of the TU and carriage of the large plasmid in the TZP-  
350 resistant isolate did not result in a significant change in fitness compared to the TZP-susceptible  
351 isolate in LB (P value = 0.9968), ISO (P value = 0.2836) and M9 (P value = 0.2204, Fig. 4). We also  
352 assessed the relative fitness of the TZP-susceptible isolate following exposure to TZP (resulting in the  
353 increase in copy number of the resistance genes present on the RM (Fig. 3)) compared to the TZP-  
354 susceptible grown in the absence of TZP (which did not result in an increase in copy number (Fig. 3)).  
355 Again, we found no significant change in fitness in LB (P value = 0.8047), ISO (P value = 0.1242) and  
356 M9 (P value = 0.2803, Fig. 4).

357

358 **Discussion**

359 Tazobactam is able to inhibit the activity of class A  $\beta$ -lactamases [39], and therefore the presence of  
360 *bla*<sub>TEM-1</sub> within the genome of an *E. coli* isolate should not result in resistance to TZP. However, two  
361 studies have linked amplification of *bla*<sub>TEM</sub>, and therefore hyperproduction of the BL, with this  
362 phenotype [15, 18], with one linking amplification and the presence of IS26 [18]. However, the exact  
363 mechanism of amplification/hyperproduction has remained elusive. Due to the emergence of a  
364 novel TZP-resistant but 3<sup>rd</sup> generation cephalosporins and carbapenems susceptible *E. coli* and *K.*  
365 *pneumoniae* phenotype [12-14], as well as the increasing reliance on TZP as an empirical treatment  
366 [6] and the recent interest in the use of TZP as a carbapenem sparing treatment for ESBL infections  
367 [40, 41], it is of growing importance to understand the mechanism of resistance. In this study we had  
368 the unique opportunity to compare a pair of clonal isolates which have evolved within a patient to  
369 become TZP-resistant but remain cephalosporin/carbapenem sensitive, allowing us to build on  
370 recent studies and identify the mechanism of IS26-mediated amplification of *bla*<sub>TEM-1B</sub> which leads to  
371 TZP-resistance.

372 We found multiple antibiotic resistance genes, including *bla*<sub>TEM-1B</sub>, co-located on a novel IS26  
373 composite transposon Tn6762 on both the TZP-resistant and TZP-susceptible isolate. This is the first  
374 time that the resistance genes *tetD* and *bla*<sub>TEM-1B</sub> have found to be present on the same transposable  
375 element and a result of insertion of several transposons into the same location, demonstrated by  
376 the presence of several insertion sequences and transposable elements on Tn6762. Amplification of  
377 *bla*<sub>TEM-1B</sub> is achieved when Tn6762 is excised from the chromosome forming a TU, evidenced by the  
378 hybrid assembly of the TZP-resistant isolate, increase in copy number of the antibiotic resistance  
379 genes present on Tn6762 and the capture of the TU in pHSG396:IS26. Precise excision and formation  
380 of a TU containing the antibiotic resistance gene *aphA1a* from a Tn4352B transposon present in a  
381 plasmid has been demonstrated before as a mechanism of movement of antibiotic resistance gene  
382 [21, 22, 42], this is the first time it has been shown to directly result in gene amplification resulting in  
383 resistance. We found no evidence from the whole genome sequencing of the TZP-resistant isolate of  
384 insertion of the TU anywhere else in the chromosome, except for a gap in sequencing where Tn6762  
385 was originally situated in the TZP-susceptible isolate adjacent to an IS26. Through PCR of the left and  
386 right junctions of the gap in sequencing, we confirmed that Tn6762 was still present at this location  
387 in the chromosome of the TZP-resistant isolate and therefore existed both as Tn6762 and TU, which  
388 the hybrid assembly was unable to resolve. We also found no evidence of a tandem repeat of the TU  
389 in the chromosome of the TZP-resistant isolate and only evidence of the TU through hybrid assembly  
390 of the genome and confirmation by PCR. Using the chloramphenicol-resistant pUC vector, pHSG396,  
391 containing a copy of IS26 from the TZP-susceptible chromosome, we were able to replicate the  
392 evolutionary event and capture a single copy of the excised TU adjacent to the IS26 copy in the  
393 plasmid, providing evidence of the insertion event, but again there was no evidence of tandem  
394 repeats of the TU in the pHSG396:IS26 plasmid. Therefore, the TU preferentially re-inserts into the  
395 chromosome adjacent to the chromosomally located IS26 via a conservative Tnp26-dependent but  
396 RecA-independent mechanism, Tnp26 replicative transposition or RecA-dependent homologous  
397 recombination [22]. While this mechanism has previously been demonstrated in terms of movement



398 of antibiotic resistance genes [21, 22], this is the first time this mechanism has been shown to cause  
399 gene amplification resulting in antibiotic resistance in a clinical isolate, be able to replicate the  
400 evolutionary event resulting in amplification *in vitro* and show that use of TZP either selects for or  
401 induces this phenotype. This mechanism is of concern as IS26 has been associated with the transfer  
402 of *bla*<sub>NDM-1</sub> in a recent nosocomial outbreak in Germany [42], and other carbapenemases [43] and  
403 therefore represents a risk of clinical resistance to any carbapenemase inhibitor currently in  
404 development [44] which needs to be investigated further. The method of capture of the TU used in  
405 this study can be used to investigate whether the same mechanism will result in amplification to  
406 other  $\beta$ -lactam/ $\beta$ -lactamase inhibitors, as well as to further confirm the role of TZP in the induction  
407 of excision of the TU, and therefore gene amplification.

408 The absence of insertion of the TU into the plasmid in the TZP-resistant isolate was notable. After  
409 determining the direction of IS26 in relation to the origin of replication in both the chromosome of  
410 the TZP-susceptible isolate and the plasmid, IS26 was in the reverse direction in the plasmid but in  
411 the forward direction on both the TU and the chromosome. The orientation of IS26 may have  
412 bearing on whether insertion of the TU can occur, as previous studies on the insertion of a TU via a  
413 conservative mechanism found that both IS26 were in direct orientation [21-23], however this needs  
414 further investigation to confirm whether the direction of the IS26 is critical for insertion of the TU.

415 Hansen *et al.* 2019 associated amplification of *bla*<sub>TEM-1</sub> in *E. coli* clinical isolate with a significant  
416 fitness cost [18]; Fitness of this isolate was compared to other unrelated clinical isolates of *E. coli*  
417 which hyperproduced Bla<sub>TEM-1</sub> due to promoter mutations, rather than the same isolate with and  
418 without amplification. This approach can lead to over- or under-estimation of fitness cost, as genetic  
419 background of the isolate can have an impact on the overall fitness affect, as can the environment  
420 fitness is assessed in [45, 46]. Adler *et al.* 2014, however, identified a fitness cost associated with  
421 IS26-mediated amplification of an antibiotic resistance cassette from a plasmid in all lineages tested  
422 [20]. In this study, we were able to compare the fitness of the paired clinical isolate and *in vitro*  
423 evolved isolates with and without amplification of the chromosomally located composite transposon

424 and found that there was no significant difference in fitness cost, despite amplification of a >10kb  
425 region with multiple functionally transcribed genes and, in terms of the TZP-resistant clinical isolate,  
426 has acquired a large plasmid. If this lack of fitness cost is translated into a physiological environment,  
427 it may result in the TZP-resistant phenotype persisting. While there was no observed fitness effect of  
428 amplification on this single isolate, the effect of amplification on bacterial fitness needs to be  
429 extensively investigated as it may not be a global phenomenon.

430

### 431 **Conclusions**

432 Resistance to the  $\beta$ -lactam/ $\beta$ -lactamase inhibitor TZP can be the result of hyperproduction of the  $\beta$ -  
433 lactamase  $bla_{TEM-1B}$  due to the IS26-associated excision and circularisation of a translocatable unit  
434 containing  $bla_{TEM-1B}$  from the chromosome either selected by or in response to exposure to TZP. In  
435 this clinical isolate and an *in vitro* evolved isolate, we found that there was no effect on fitness due  
436 to the amplification and subsequent carriage of high numbers of the TU. This mechanism of  
437 amplification, and the subsequent hyperproduction, of  $bla_{TEM-1B}$  is an important consideration if  
438 treatment failure involving TZP occurs, as well as other  $\beta$ -lactam/ $\beta$ -lactamase inhibitor  
439 combinations, and when using genomic data to predict resistance/susceptibility to  $\beta$ -lactam/ $\beta$ -  
440 lactamase inhibitor combinations.

441

### 442 **Author contributions**

443 ATMH and TE conceptualised the study. JM, PR, CMP, CC, JvA, and AH collated isolate metadata,  
444 clinical antimicrobial susceptibility data and patient treatment data. ATMH, AJF, ERA, APR and TE  
445 contributed to the experimental design and data analysis. ATMH, AJF and TE contributed to carrying  
446 out the experiments. ATMH and TE wrote the first draft of the manuscript, which was then edited  
447 and approved all authors by all authors.

448

449 **Data availability**

450 Unicycler hybrid assemblies of the two clonal isolates of *E. coli* were submitted to GenBank under  
451 the BioProject PRJNA607545. Accession number CP048934 corresponds to TZP-susceptible isolate  
452 (190693) and accession number JAAKGF000000000 corresponds to TZP-resistant isolate (169757).

453

454 **Funding**

455 This work was supported by the Liverpool School of Tropical Medicine Director's Catalyst Fund to TE.  
456 APR would like to acknowledge funding from the AMR Cross-Council Initiative through a grant from  
457 the Medical Research Council, a Council of UK Research and Innovation, and the National Institute  
458 for Health Research. (Grant Numbers MR/S004793/1 and NIHR200632).

459

460 **Disclaimer**

461 This report is independent research funded by the Department of Health and Social Care. The views  
462 expressed in this publication are those of the authors and not necessarily those of the NHS or the  
463 Department of Health and Social Care.

464

465 **References**

- 466 1. Bush, K., G. Jacoby, and A. Medeiros, *A Functional Classification Scheme for b-Lactamases*  
467 *and Its Correlation with Molecular Structure*. *Antimicrob Agents Chemother*, 1995. **39**(6): p.  
468 1211-1233.
- 469 2. Bush, K. and P.A. Bradford, *beta-Lactams and beta-Lactamase Inhibitors: An Overview*. *Cold*  
470 *Spring Harb Perspect Med*, 2016. **6**(8).

- 471 3. Tehrani, K. and N.I. Martin, *beta-lactam/beta-lactamase inhibitor combinations: an update*.  
472 Medchemcomm, 2018. **9**(9): p. 1439-1456.
- 473 4. Ohlin, B., et al., *Piperacillin/Tazobactam Compared with Cefuroxime/ Metronidazole in the*  
474 *Treatment of Intra-abdominal Infections*. Eur J Surg, 1999. **165**: p. 875-884.
- 475 5. Viscoli, C., et al., *Piperacillin-tazobactam monotherapy in high-risk febrile and neutropenic*  
476 *cancer patients*. Clin Microbiol Infect, 2006. **12**(3): p. 212-6.
- 477 6. Cooke, J., et al., *Longitudinal trends and cross-sectional analysis of English national hospital*  
478 *antibacterial use over 5 years (2008-13): working towards hospital prescribing quality*  
479 *measures*. J Antimicrob Chemother, 2015. **70**(1): p. 279-85.
- 480 7. Bou-Antoun, S., et al., *Descriptive epidemiology of Escherichia coli bacteraemia in England,*  
481 *April 2012 to March 2014*. Euro Surveill, 2016. **21**(35).
- 482 8. Lee, J., et al., *The impact of the increased use of piperacillin/tazobactam on the selection of*  
483 *antibiotic resistance among invasive Escherichia coli and Klebsiella pneumoniae isolates*. Int J  
484 Infect Dis, 2013. **17**(8): p. e638-43.
- 485 9. Jamal, W.Y., M.J. Albert, and V.O. Rotimi, *High Prevalence of New Delhi Metallo-beta-*  
486 *Lactamase-1 (NDM-1) Producers among Carbapenem-Resistant Enterobacteriaceae in*  
487 *Kuwait*. PLoS One, 2016. **11**(3): p. e0152638.
- 488 10. Papp-Wallace, K.M. and R.A. Bonomo, *New beta-Lactamase Inhibitors in the Clinic*. Infect Dis  
489 Clin North Am, 2016. **30**(2): p. 441-464.
- 490 11. Wang, J., et al., *Semi-rational screening of the inhibitors and  $\beta$ -lactam antibiotics against the*  
491 *New Delhi metallo- $\beta$ -lactamase 1 (NDM-1) producing E. coli*. RSC Advances, 2018. **8**(11): p.  
492 5936-5944.

- 493 12. Monogue, M.L., et al., *Detection of Piperacillin-Tazobactam-Resistant/Pan-beta-Lactam-*  
494 *Susceptible Escherichia coli with Current Automated Susceptibility Test Systems.* Infect  
495 Control Hosp Epidemiol, 2017. **38**(3): p. 379-380.
- 496 13. Stainton, S.M., et al., *Prevalence, patient characteristics and outcomes of a novel*  
497 *piperacillin/tazobactam-resistant, pan-beta-lactam-susceptible phenotype in*  
498 *Enterobacteriaceae: implications for selective reporting.* Clin Microbiol Infect, 2017. **23**(8): p.  
499 581-582.
- 500 14. Baker, T.M., et al., *Epidemiology of Bloodstream Infections Caused by Escherichia coli and*  
501 *Klebsiella pneumoniae That Are Piperacillin-Tazobactam-Nonsusceptible but Ceftriaxone-*  
502 *Susceptible.* Open Forum Infect Dis, 2018. **5**(12): p. ofy300.
- 503 15. Schechter LM, et al., *Extensive Gene Amplification as a Mechanism for Piperacillin-*  
504 *Tazobactam Resistance in Escherichia coli.* MBio, 2018. **9**(2): p. e00583-18.
- 505 16. Lartigue, M.F., et al., *Promoters P3, Pa/Pb, P4, and P5 upstream from bla(TEM) genes and*  
506 *their relationship to beta-lactam resistance.* Antimicrob Agents Chemother, 2002. **46**(12): p.  
507 4035-7.
- 508 17. Zhou, K., et al., *Piperacillin-Tazobactam (TZP) Resistance in Escherichia coli Due to*  
509 *Hyperproduction of TEM-1 beta-Lactamase Mediated by the Promoter Pa/Pb.* Front  
510 Microbiol, 2019. **10**: p. 833.
- 511 18. Hansen, K.H., et al., *Resistance to piperacillin/tazobactam in Escherichia coli resulting from*  
512 *extensive IS26-associated gene amplification of blaTEM-1.* J Antimicrob Chemother, 2019.  
513 **74**(11): p. 3179-3183.
- 514 19. Nicoloff, H., et al., *The high prevalence of antibiotic heteroresistance in pathogenic bacteria*  
515 *is mainly caused by gene amplification.* Nat Microbiol, 2019. **4**(3): p. 504-514.

- 516 20. Adler, M., et al., *High fitness costs and instability of gene duplications reduce rates of*  
517 *evolution of new genes by duplication-divergence mechanisms*. *Mol Biol Evol*, 2014. **31**(6): p.  
518 1526-35.
- 519 21. Harmer, C.J. and R.M. Hall, *IS26-Mediated Precise Excision of the IS26-aphA1a Translocatable*  
520 *Unit*. *MBio*, 2015. **6**(6): p. e01866-15.
- 521 22. Harmer, C.J., R.A. Moran, and R.M. Hall, *Movement of IS26-associated antibiotic resistance*  
522 *genes occurs via a translocatable unit that includes a single IS26 and preferentially inserts*  
523 *adjacent to another IS26*. *MBio*, 2014. **5**(5): p. e01801-14.
- 524 23. Harmer, C.J. and R.M. Hall, *IS26-Mediated Formation of Transposons Carrying Antibiotic*  
525 *Resistance Genes*. *mSphere*, 2016. **1**(2).
- 526 24. Institute, C.a.L.S., *M07 Methods for Dilution Antimicrobial Susceptibility Testing for Bacteria*  
527 *That Grow Aerobically*, in *11th ed. CLSI Standard M07*. 2018, Clinical and Laboratory  
528 Standards Institute: Wayne, PA.
- 529 25. Wick, R.R., et al., *Unicycler: Resolving bacterial genome assemblies from short and long*  
530 *sequencing reads*. *PLoS Comput Biol*, 2017. **13**(6): p. e1005595.
- 531 26. Mikheenko, A., et al., *Versatile genome assembly evaluation with QUAST-LG*. *Bioinformatics*,  
532 2018. **34**(13): p. i142-i150.
- 533 27. Seemann, T., *Prokka: rapid prokaryotic genome annotation*. *Bioinformatics*, 2014. **30**(14): p.  
534 2068-9.
- 535 28. Wick, R.R., et al., *Bandage: interactive visualization of de novo genome assemblies*.  
536 *Bioinformatics*, 2015. **31**(20): p. 3350-2.
- 537 29. Larsen, M.V., et al., *Multilocus sequence typing of total-genome-sequenced bacteria*. *J Clin*  
538 *Microbiol*, 2012. **50**(4): p. 1355-61.

- 539 30. Joensen, K.G., et al., *Rapid and Easy In Silico Serotyping of Escherichia coli Isolates by Use of*  
540 *Whole-Genome Sequencing Data*. J Clin Microbiol, 2015. **53**(8): p. 2410-26.
- 541 31. S, K., et al., *Versatile and open software for comparing large genomes*. Genome Biology,  
542 2004. **5**(2): p. R12.1-R12.9.
- 543 32. Lee, I., et al., *OrthoANI: An improved algorithm and software for calculating average*  
544 *nucleotide identity*. Int J Syst Evol Microbiol, 2016. **66**(2): p. 1100-1103.
- 545 33. Zankari, E., et al., *Identification of acquired antimicrobial resistance genes*. J Antimicrob  
546 Chemother, 2012. **67**(11): p. 2640-4.
- 547 34. Carattoli, A., et al., *In silico detection and typing of plasmids using PlasmidFinder and plasmid*  
548 *multilocus sequence typing*. Antimicrob Agents Chemother, 2014. **58**(7): p. 3895-903.
- 549 35. Chung, C., S. Niemela, and R. Miller, *One-step preparation of competent Escherichia coli:*  
550 *Transformation and storage of bacterial cells in the same solution*. Proceedings of the  
551 National Academy of Sciences of the United States of America, 1989. **86**: p. 2172-2175.
- 552 36. Thulin, M., *BAT: an online tool for analysing growth curves*. 2018: Retrieved from  
553 <http://www.mansthulin.se/bat/>.
- 554 37. Testing, T.E.C.o.A.S., *Breakpoint tables for interpretation of MICs and zone diameters, in*  
555 *Version 10.0*. 2020: <http://www.eucast.org>.
- 556 38. Tansirichaiya, S., M.A. Rahman, and A.P. Roberts, *The Transposon Registry*. Mob DNA, 2019.  
557 **10**: p. 40.
- 558 39. Drawz, S. and R. Bonomo, *Three Decades of  $\beta$ -Lactamase Inhibitors*. Clinical Microbiology  
559 Reviews, 2010. **23**(1): p. 160-201.
- 560 40. Harris, P.N.A., et al., *Effect of Piperacillin-Tazobactam vs Meropenem on 30-Day Mortality for*  
561 *Patients With E coli or Klebsiella pneumoniae Bloodstream Infection and Ceftriaxone*  
562 *Resistance: A Randomized Clinical Trial*. JAMA, 2018. **320**(10): p. 984-994.

- 563 41. Sharara, S.L., et al., *Is Piperacillin-Tazobactam Effective for the Treatment of Pyelonephritis*  
564 *Caused by ESBL-producing Organisms?* Clin Infect Dis, 2019.
- 565 42. Weber, R.E., et al., *IS26-Mediated Transfer of bla NDM-1 as the Main Route of Resistance*  
566 *Transmission During a Polyclonal, Multispecies Outbreak in a German Hospital.* Front  
567 Microbiol, 2019. **10**: p. 2817.
- 568 43. He, S., et al., *Insertion Sequence IS26 Reorganizes Plasmids in Clinically Isolated Multidrug-*  
569 *Resistant Bacteria by Replicative Transposition.* mBio, 2015. **6**(3): p. e00762.
- 570 44. Bush, K. and P.A. Bradford, *Interplay between beta-lactamases and new beta-lactamase*  
571 *inhibitors.* Nat Rev Microbiol, 2019. **17**(5): p. 295-306.
- 572 45. Vogwill, T., M. Kojadinovic, and R.C. MacLean, *Epistasis between antibiotic resistance*  
573 *mutations and genetic background shape the fitness effect of resistance across species of*  
574 *Pseudomonas.* Proc Biol Sci, 2016. **283**(1830).
- 575 46. Hubbard, A.T.M., et al., *Effect of Environment on the Evolutionary Trajectories and Growth*  
576 *Characteristics of Antibiotic-Resistant Escherichia coli Mutants.* Front Microbiol, 2019. **10**: p.  
577 2001.

578

579 **Tables and figures**

580 **Table 1:** Minimum inhibitory concentrations of gentamicin (GEN), tetracycline (TET),  
581 chloramphenicol (CHL), ciprofloxacin (CIP), amoxicillin/clavulanic acid (AMC) and  
582 piperacillin/tazobactam (TZP) (with and without PA $\beta$ N) towards the TZP-susceptible and TZP-  
583 resistant isolates

|             | GEN | TET | CHL | CIP | AMC | TZP     | TZP + PA $\beta$ N |
|-------------|-----|-----|-----|-----|-----|---------|--------------------|
| <b>TZP-</b> | 128 | 256 | 4   | 64  | 32  | 2 - 4/4 | 2/4                |



| susceptible          |        |     |   |     |          |      |      |
|----------------------|--------|-----|---|-----|----------|------|------|
| <b>TZP-resistant</b> | 1024 - | 512 | 4 | 128 | 64 - 128 | 64/4 | 32/4 |
|                      | >1024  |     |   |     |          |      |      |

584

585

586 **Table 2:** Predicted antimicrobial resistance genes by ResFinder found on the genome of the TZP-  
 587 susceptible and TZP-resistant isolates and their position in genome. \*The resistance gene catB3 was  
 588 predicted by ResFinder to be present with 69.8% length, but both isolates were phenotypically  
 589 chloramphenicol susceptible

| Antimicrobial Resistance Gene | TZP-susceptible isolate | TZP-resistant isolate |
|-------------------------------|-------------------------|-----------------------|
| <i>bla<sub>OXA-1</sub></i>    | Chromosome              | Translocatable unit   |
| <i>bla<sub>TEM-1B</sub></i>   | Chromosome              | Translocatable unit   |
| <i>aac(3)-IIa</i>             | Chromosome              | Translocatable unit   |
| <i>aac(6')-Ib-cr</i>          | Chromosome              | Translocatable unit   |
| <i>aadA1</i>                  | Chromosome              | Chromosome            |
| <i>aph(3'')-Ib</i>            | Chromosome              | Chromosome            |
| <i>aph(6)-Id</i>              | Chromosome              | Chromosome            |
| <i>tet(D)</i>                 | Chromosome              | Translocatable unit   |
| <i>dfrA1</i>                  | Chromosome              | Chromosome            |
| <i>sul2</i>                   | Chromosome              | Chromosome            |
| <i>mdf(A)</i>                 | Chromosome              | Chromosome            |

| <i>catB3</i> * | Chromosome | Translocatable unit |
|----------------|------------|---------------------|
|----------------|------------|---------------------|

590

591 **Figure 1: A)** Increase in nitrocefin hydrolysis by the TZP-resistant isolate compared to the TZP-  
592 susceptible isolate as measured at OD<sub>450</sub>, due to hyperproduction of a BLS in the TZP-resistant  
593 isolate. **B)** Comparison of the fold change in copy number of the antimicrobial resistance genes  
594 present on the composite transposon of the TZP-susceptible isolate/translocatable unit of the TZP-  
595 susceptible isolate as assessed by qPCR compared to the housekeeping gene *uidA*

596 **A**

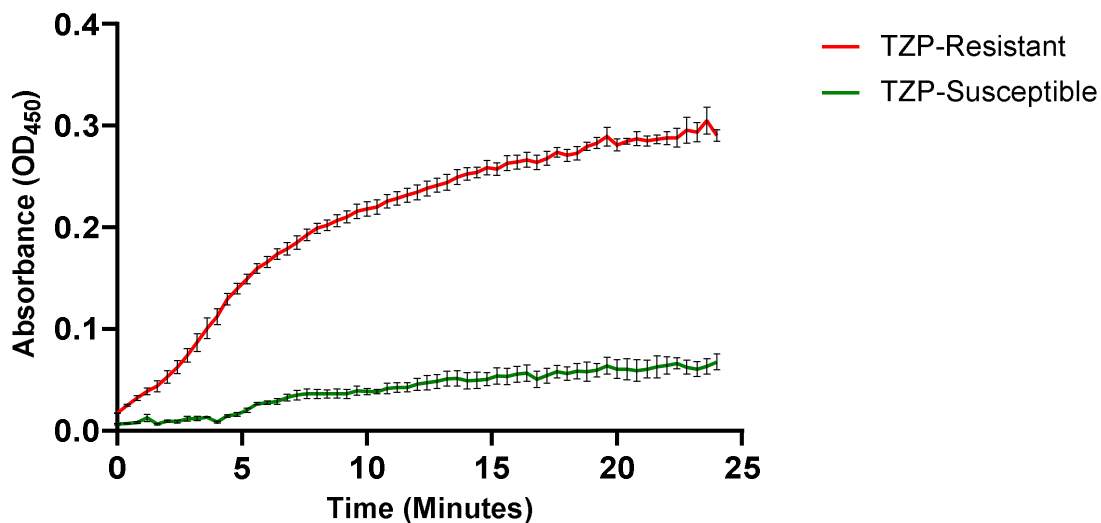

597  
598

599 **B**

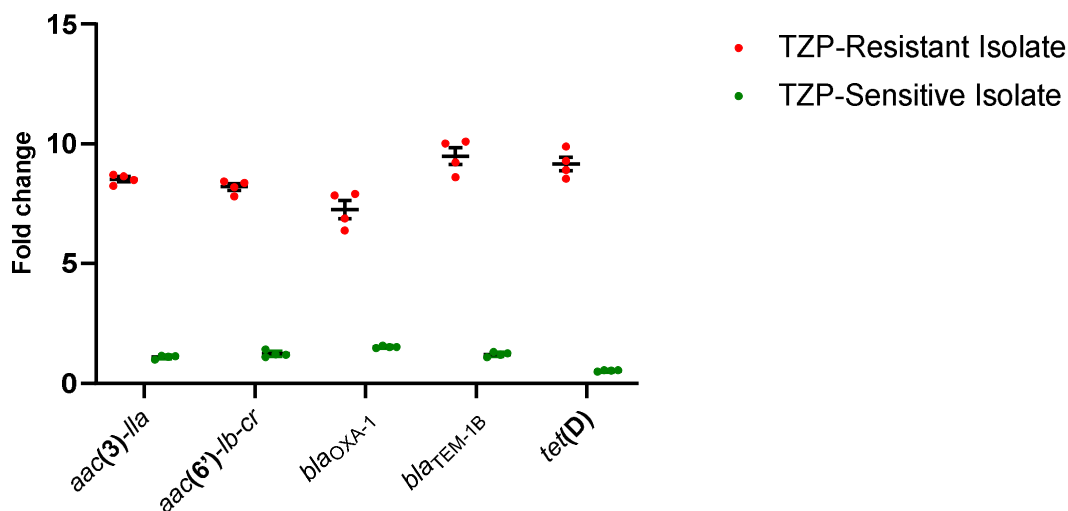

600

601

602 **Figure 2:** Schematic showing **A)** the characterisation of Tn6762 (HP = hypothetical protein) and the  
603 position of the primer pairs to detect **B)** the junctions of the Tn6762 in the chromosome, **C)** the  
604 presence of the TU and **D)** the junctions of the insertion of the TU into pHSG396:IS26. **E)** Schematic  
605 of the proposed mechanism of leading to hyperproduction of *bla*<sub>TEM-1B</sub>; **1)** a composite transposon,  
606 Tn6762, is present on the chromosome flanked by two copies of IS26. Due to selective pressure from  
607 TZP, **2)** Tn6762 is excised from the chromosome, **3)** which then forms a translocatable unit (TU)  
608 which **4)** re-inserts and excises from the chromosome adjacent to the chromosomally located IS26,  
609 increasing the copy number of *bla*<sub>TEM-1B</sub>

610

611

612

613

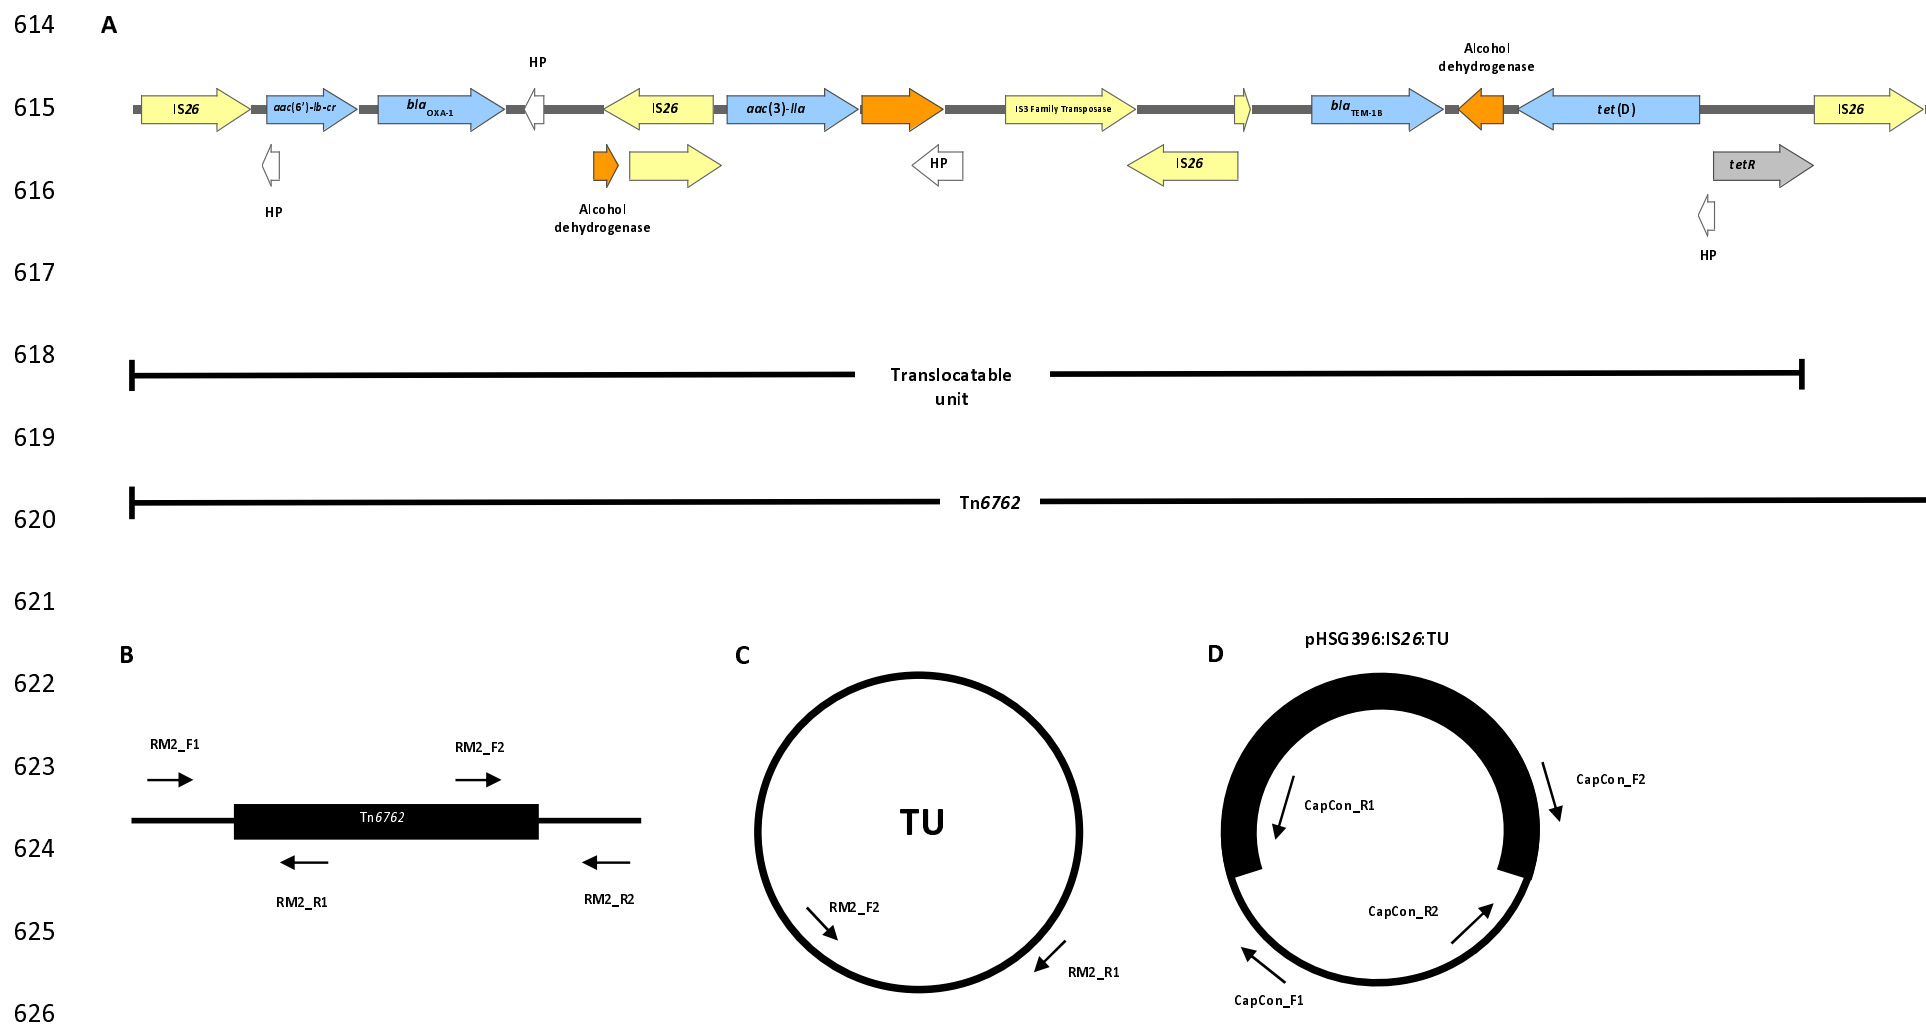

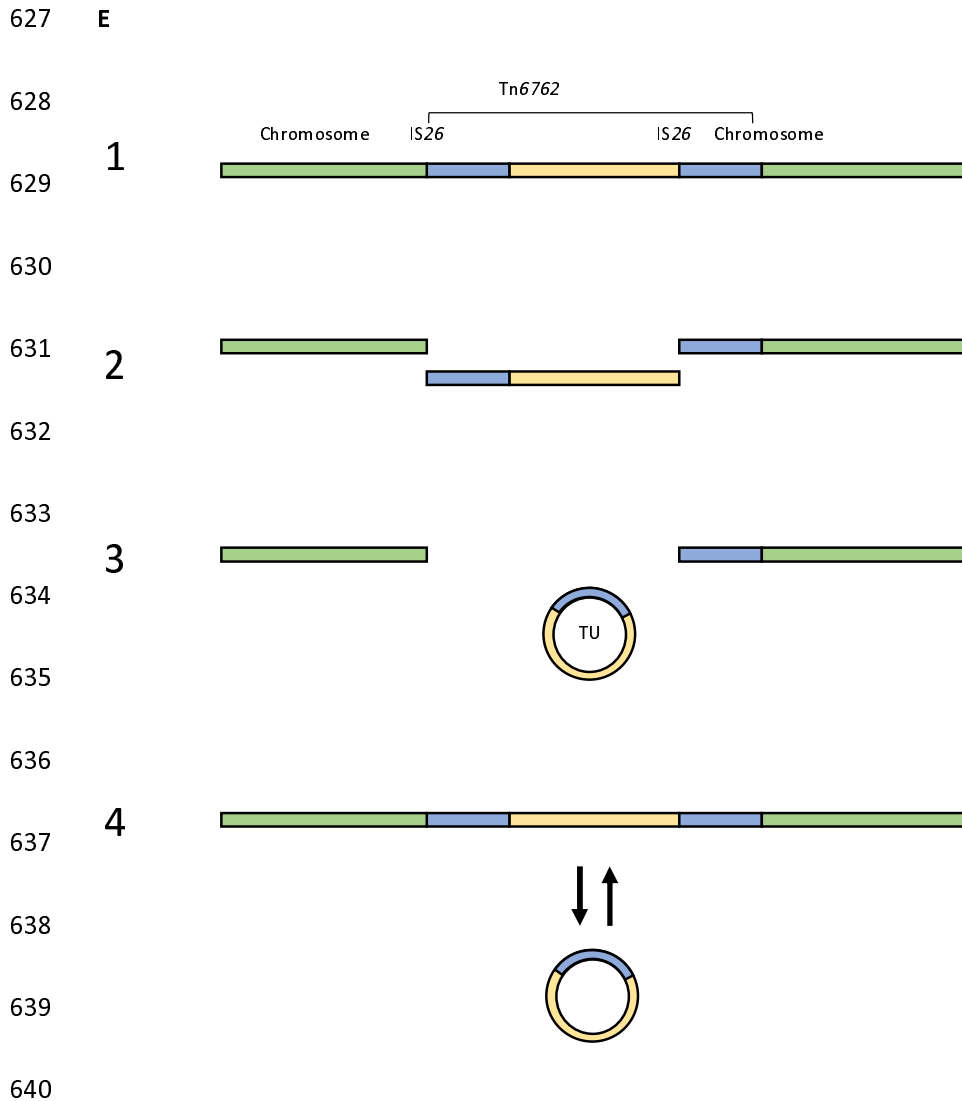

641 **Figure 3:** Fold change in copy number of all the antimicrobial resistance genes found on the  
642 composite transposon compared to the housekeeping gene *uidA* following growth of the TZP-  
643 susceptible isolate in the absence of antibiotics, TZP-susceptible isolate in the presence of 8/4 µg/ml  
644 TZP, TZP-susceptible isolate transformed with pHSG396 plasmid containing IS26 in the presence of  
645 8/4 µg/ml TZP and 35 µg/ml chloramphenicol and TZP-susceptible isolate transformed with pHSG396  
646 plasmid containing IS26 in the presence of 35 µg/ml chloramphenicol only

647

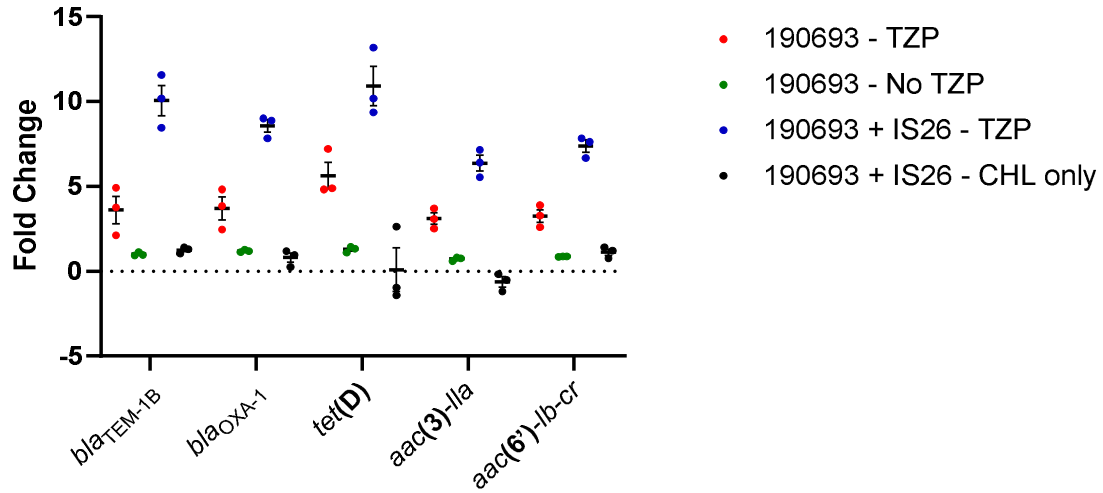

648  
649

650

651 **Figure 4:** Relative fitness of the TZP-resistant isolate compared to the TZP-susceptible isolate and the  
652 TZP-susceptible isolate grown in the presence of TZP compared to the TZP-susceptible isolate grown  
653 in the absence of TZP, assessed comparatively in LB, ISO and M9

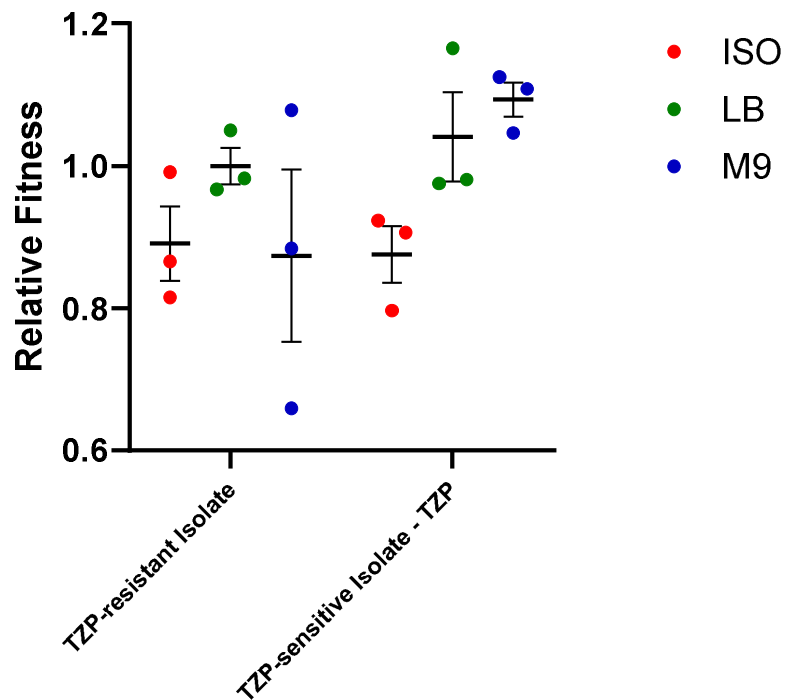

654
